# Supplementary material for: Codon usage in twelve species of Drosophila
Source: Springer Nature journal article supplement (doi:10.1186/1471-2148-7-226), 2007-11-15
Supplement: Additional file 2 [file 1471-2148-7-226-s2.pdf]

**Table S1. Supplementary information for intron data from the 12 Drosophila genomes.**

|                                         | <b>Dmel</b> | <b>Dsim</b> | <b>Dsec</b> | <b>Dyak</b> | <b>Dere</b> | <b>Dana</b> | <b>Dpse</b> | <b>Dper</b> | <b>Dwil</b> | <b>Dmoj</b> | <b>Dvir</b> | <b>Dgri</b> |
|-----------------------------------------|-------------|-------------|-------------|-------------|-------------|-------------|-------------|-------------|-------------|-------------|-------------|-------------|
| <b>[All CDSs]</b>                       | 19,389      | 17,049      | 21,332      | 18,816      | 16,880      | 22,551      | 17,328      | 23,029      | 20,211      | 17,738      | 17,679      | 16,901      |
| No. introns                             | 50,980      | 39,076      | 43,726      | 44,511      | 42,102      | 46,630      | 42,378      | 46,290      | 43,129      | 42,140      | 42,495      | 42,513      |
| No. introns (200/2000)*                 | 12,880      | 8,961       | 10,293      | 10,498      | 9,799       | 10,897      | 7,693       | 9,673       | 8,674       | 9,529       | 10,328      | 11,312      |
| Total length (bp)                       | 58,587,969  | 31,023,716  | 34,518,908  | 37,499,025  | 35,136,800  | 49,971,844  | 33,348,609  | 41,494,389  | 52,574,815  | 44,720,149  | 46,259,090  | 40,001,651  |
| Average length (bp)                     | 1149.2      | 793.9       | 789.4       | 842.5       | 834.6       | 1071.7      | 786.9       | 896.4       | 1219.0      | 1061.2      | 1088.6      | 940.9       |
| GCI% (Weighted)                         | 40.1        | 40.8        | 40.8        | 40.6        | 40.9        | 40.5        | 43.8        | 44.0        | 35.8        | 37.7        | 38.8        | 36.8        |
| GCI% (Average)                          | 36.6        | 37.5        | 37.6        | 37.0        | 38.2        | 36.3        | 42.0        | 42.8        | 33.0        | 36.0        | 37.1        | 33.6        |
| GCI% (Ave 200/2000)                     | 37.6        | 38.5        | 38.7        | 38.3        | 38.8        | 39.6        | 42.7        | 44.0        | 34.9        | 35.9        | 37.3        | 33.5        |
| <b>[6698 homologue set]</b>             |             |             |             |             |             |             |             |             |             |             |             |             |
| No. introns                             | 26,828      | 19,890      | 20,742      | 20,768      | 20,716      | 20,826      | 20,492      | 20,467      | 20,535      | 20,784      | 20,772      | 20,876      |
| No. introns (200/2000)*                 | 6,796       | 4,430       | 4,536       | 4,644       | 4,630       | 4,139       | 3,389       | 3,427       | 3,787       | 4,373       | 4,656       | 5,249       |
| Total length (bp)                       | 31,095,540  | 13,714,573  | 14,036,525  | 14,856,026  | 14,591,253  | 18,215,738  | 14,448,474  | 15,266,127  | 20,399,598  | 19,244,841  | 18,992,434  | 17,193,706  |
| Average length (bp)                     | 1159.1      | 689.5       | 676.7       | 715.3       | 704.4       | 874.7       | 705.1       | 745.9       | 993.4       | 926.0       | 914.3       | 827.2       |
| GCI% (Weighted)                         | 40.2        | 40.7        | 40.5        | 40.3        | 41.0        | 40.1        | 43.7        | 43.9        | 35.0        | 37.2        | 38.4        | 36.4        |
| GCI% (Average)                          | 37.0        | 37.7        | 37.4        | 36.7        | 38.1        | 34.9        | 41.7        | 42.2        | 32.3        | 35.1        | 36.7        | 33.2        |
| GCI% (Ave 200/2000)                     | 37.8        | 38.2        | 37.8        | 37.5        | 38.3        | 37.4        | 42.3        | 42.6        | 33.2        | 34.6        | 36.2        | 32.8        |
| <b>[6665 non-4th chr homologue set]</b> |             |             |             |             |             |             |             |             |             |             |             |             |
| No. introns                             | 26,516      | 19,764      | 20,566      | 20,587      | 20,535      | 20,662      | 20,318      | 20,284      | 20,341      | 20,597      | 20,586      | 20,600      |
| No. introns (200/2000)*                 | 6,671       | 4,386       | 4,475       | 4,587       | 4,570       | 4,123       | 3,355       | 3,387       | 3,747       | 4,313       | 4,597       | 5,176       |
| Total length (bp)                       | 30,718,572  | 13,594,527  | 13,860,615  | 14,629,555  | 14,358,572  | 15,569,291  | 14,283,251  | 15,089,082  | 20,145,720  | 19,011,741  | 18,791,393  | 17,045,969  |
| Average length (bp)                     | 1158.5      | 687.8       | 674.0       | 710.6       | 699.2       | 753.5       | 703.0       | 743.9       | 990.4       | 923.0       | 912.8       | 827.5       |
| GCI% (Weighted)                         | 40.3        | 40.8        | 40.6        | 40.4        | 41.1        | 40.2        | 43.8        | 44.0        | 35.0        | 37.2        | 38.5        | 36.5        |
| GCI% (Average)                          | 37.0        | 37.7        | 37.4        | 36.8        | 38.2        | 34.9        | 41.8        | 42.3        | 32.3        | 35.2        | 36.7        | 33.3        |
| GCI% (Ave 200/2000)                     | 37.9        | 38.2        | 37.9        | 37.5        | 38.4        | 37.4        | 42.3        | 42.7        | 33.2        | 34.6        | 36.3        | 32.9        |
| <b>[33 4th chr homologue set]</b>       |             |             |             |             |             |             |             |             |             |             |             |             |
| No. introns                             | 312         | 126         | 176         | 181         | 181         | 164         | 174         | 183         | 194         | 187         | 186         | 186         |
| No. introns (200/2000)*                 | 125         | 44          | 61          | 57          | 60          | 16          | 34          | 40          | 40          | 60          | 59          | 73          |
| Total length (bp)                       | 376,968     | 120,046     | 175,910     | 226,471     | 232,681     | 2,646,447   | 165,223     | 177,045     | 253,878     | 233,100     | 201,041     | 147,737     |
| Average length (bp)                     | 1208.2      | 952.8       | 999.5       | 1251.2      | 1285.5      | 16136.9     | 949.6       | 967.5       | 1308.7      | 1246.5      | 1080.9      | 794.3       |
| GCI% (Weighted)                         | 32.1        | 34.0        | 32.3        | 33.3        | 32.6        | 39.4        | 35.4        | 35.9        | 35.8        | 35.8        | 34.2        | 30.2        |
| GCI% (Average)                          | 28.8        | 29.0        | 28.3        | 28.5        | 27.9        | 28.8        | 31.3        | 31.1        | 34.1        | 31.2        | 30.6        | 26.9        |
| GCI% (Ave 200/2000)                     | 30.4        | 32.1        | 30.7        | 31.2        | 30.4        | 28.9        | 33.5        | 33.5        | 33.1        | 34.6        | 32.4        | 26.3        |
| <b>[All Dmel 4th chr genes]</b>         |             |             |             |             |             |             |             |             |             |             |             |             |
| No. introns                             | 79          |             |             |             |             |             |             |             |             |             |             |             |
| No. introns (200/2000)*                 | 822         |             |             |             |             |             |             |             |             |             |             |             |
| Total length (bp)                       | 353         |             |             |             |             |             |             |             |             |             |             |             |
| Average length (bp)                     | 871,947     |             |             |             |             |             |             |             |             |             |             |             |
|                                         | 1060.8      |             |             |             |             |             |             |             |             |             |             |             |
| GCI% (Weighted)                         | 32.2        |             |             |             |             |             |             |             |             |             |             |             |
| GCI% (Average)                          | 28.6        |             |             |             |             |             |             |             |             |             |             |             |
| GCI% (Ave 200/2000)                     | 30.4        |             |             |             |             |             |             |             |             |             |             |             |

\*No. introns used after removing too short (< 200bp) and too long (> 2000bp) introns.

GCI% (Weighted): Cumulative GC% calculated from all introns concatenated

GCI% (Average): Average GC% calculated from all introns

GCI% (Ave 200/2000): Average GC% calculated from introns between 200bp and 2000bp

**Table S2. Supplementary information for intron data from the 12 Drosophila genomes after removing transposable element sequences and 50bp each of start and end regions.**

|                                                                                                 | Dmel       | Dsim       | Dsec       | Dyak       | Dere       | Dana       | Dpse       | Dper       | Dwil       | Dmoj       | Dvir       | Dgri       |
|-------------------------------------------------------------------------------------------------|------------|------------|------------|------------|------------|------------|------------|------------|------------|------------|------------|------------|
| <b>[All CDSs after removing TEs and 50 bp each from sart/end regions]</b>                       |            |            |            |            |            |            |            |            |            |            |            |            |
| No. introns                                                                                     | 47,676     | 39,076     | 43,726     | 44,511     | 42,102     | 46,630     | 42,378     | 46,290     | 43,129     | 42,140     | 42,495     | 42,513     |
| No. introns (200/2000)*                                                                         | 12,301     | 8,949      | 10,113     | 14,020     | 9,717      | 10,111     | 7,596      | 8,988      | 8,454      | 9,448      | 10,202     | 11,320     |
| Total length (bp)                                                                               | 48,919,379 | 27,100,612 | 29,239,690 | 34,005,517 | 29,499,000 | 36,104,413 | 28,845,315 | 34,345,799 | 44,256,343 | 38,671,234 | 38,227,733 | 35,887,276 |
| Average length (bp)                                                                             | 1026.1     | 693.5      | 668.7      | 1636.8     | 764.0      | 774.3      | 680.7      | 742.0      | 1026.1     | 917.7      | 899.6      | 844.2      |
| GCI% (Weighted)                                                                                 | 40.3       | 41.1       | 40.9       | 40.7       | 41.3       | 40.4       | 44.0       | 44.2       | 35.1       | 37.3       | 38.5       | 36.7       |
| GCI% (Average)                                                                                  | 36.9       | 38.4       | 38.1       | 37.6       | 38.5       | 38.1       | 43.1       | 43.7       | 34.1       | 35.5       | 37.2       | 33.6       |
| GCI% (Ave 200/2000)                                                                             | 37.5       | 37.8       | 37.4       | 37.1       | 37.8       | 37.5       | 42.4       | 42.8       | 33.3       | 34.5       | 36.4       | 32.7       |
| <b>[6698 homologue set after removing TEs and 50 bp each from sart/end regions]</b>             |            |            |            |            |            |            |            |            |            |            |            |            |
| No. introns                                                                                     | 24,960     | 19,890     | 20,742     | 20,768     | 20,716     | 20,826     | 20,492     | 20,467     | 20,535     | 20,784     | 20,772     | 20,876     |
| No. introns (200/2000)*                                                                         | 8,769      | 4,505      | 4,606      | 4,700      | 4,698      | 4,227      | 3,460      | 3,509      | 3,860      | 4,472      | 4,769      | 5,324      |
| Total length (bp)                                                                               | 27,923,159 | 12,046,139 | 12,223,018 | 13,238,523 | 12,842,331 | 14,447,517 | 12,679,626 | 13,379,761 | 18,175,927 | 17,016,748 | 16,473,328 | 15,410,088 |
| Average length (bp)                                                                             | 1118.9     | 1545.96    | 1520.09    | 1636.81    | 1581.76    | 1990.56    | 2074.55    | 2107.05    | 2564.69    | 2236.1     | 2120.39    | 1753.54    |
| GCI% (Weighted)                                                                                 | 40.3       | 41.1       | 40.9       | 40.7       | 41.3       | 40.4       | 44.0       | 44.2       | 35.1       | 37.3       | 38.5       | 36.7       |
| GCI% (Average)                                                                                  | 36.9       | 38.4       | 38.1       | 37.6       | 38.5       | 38.1       | 43.1       | 43.7       | 34.1       | 35.5       | 37.2       | 33.6       |
| GCI% (Ave 200/2000)                                                                             | 37.5       | 37.8       | 37.4       | 37.1       | 37.8       | 37.5       | 42.4       | 42.8       | 33.3       | 34.5       | 36.4       | 32.7       |
| <b>[6665 non-4th chr homologue set after removing TEs and 50 bp each from sart/end regions]</b> |            |            |            |            |            |            |            |            |            |            |            |            |
| No. introns                                                                                     | 24,679     | 19,764     | 20,566     | 20,587     | 20,535     | 20,662     | 20,318     | 20,284     | 20,341     | 20,597     | 20,586     | 20,600     |
| No. introns (200/2000)*                                                                         | 8,621      | 4,458      | 4,538      | 4,643      | 4,632      | 4,204      | 3,420      | 3,467      | 3,818      | 4,408      | 4,708      | 5,250      |
| Total length (bp)                                                                               | 27,610,339 | 11,945,019 | 12,077,763 | 13,027,204 | 12,660,291 | 13,218,280 | 12,556,698 | 13,253,322 | 17,949,353 | 16,850,507 | 16,306,659 | 15,288,299 |
| Average length (bp)                                                                             | 1119.0     | 1547.5     | 1522.1     | 1632.1     | 1580.6     | 1845.9     | 2081.3     | 2115.5     | 2563.5     | 2245.2     | 2127.1     | 1760.9     |
| GCI% (Weighted)                                                                                 | 40.3       | 41.1       | 41.0       | 40.8       | 41.4       | 40.8       | 44.1       | 44.3       | 35.1       | 37.3       | 38.6       | 36.8       |
| GCI% (Average)                                                                                  | 37.0       | 38.5       | 38.2       | 37.7       | 38.6       | 38.2       | 43.3       | 43.9       | 34.2       | 35.5       | 37.3       | 33.7       |
| GCI% (Ave 200/2000)                                                                             | 37.6       | 37.9       | 37.5       | 37.2       | 37.9       | 37.5       | 42.5       | 43.0       | 33.5       | 34.5       | 36.5       | 32.8       |
| <b>[33 4th chr homologue set after removing TEs and 50 bp each from sart/end regions]</b>       |            |            |            |            |            |            |            |            |            |            |            |            |
| No. introns                                                                                     | 281        | 126        | 176        | 181        | 181        | 164        | 174        | 183        | 194        | 187        | 186        | 186        |
| No. introns (200/2000)*                                                                         | 148        | 47         | 68         | 57         | 66         | 23         | 40         | 42         | 42         | 64         | 61         | 74         |
| Total length (bp)                                                                               | 312,820    | 101,120    | 145,255    | 211,319    | 182,040    | 1,229,237  | 122,928    | 126,439    | 226,574    | 166,241    | 166,669    | 121,789    |
| Average length (bp)                                                                             | 1113.2     | 1385.2     | 1370.3     | 1993.6     | 1670.1     | 12672.6    | 1556.1     | 1487.5     | 2665.6     | 1583.3     | 1618.2     | 1149.0     |
| GCI% (Weighted)                                                                                 | 32.1       | 34.0       | 32.3       | 33.3       | 32.6       | 39.4       | 35.4       | 35.9       | 35.8       | 35.8       | 34.2       | 30.2       |
| GCI% (Average)                                                                                  | 28.8       | 29.0       | 28.3       | 28.5       | 27.9       | 28.8       | 31.3       | 31.1       | 34.1       | 31.2       | 30.6       | 26.9       |
| GCI% (Ave 200/2000)                                                                             | 29.8       | 32.7       | 31.4       | 32.0       | 30.5       | 30.6       | 33.8       | 34.2       | 33.3       | 33.9       | 32.9       | 26.5       |
| <b>[All Dmel 4th chr genes]</b>                                                                 |            |            |            |            |            |            |            |            |            |            |            |            |
|                                                                                                 | 79         |            |            |            |            |            |            |            |            |            |            |            |
| No. introns                                                                                     | 759        |            |            |            |            |            |            |            |            |            |            |            |
| No. introns (200/2000)*                                                                         | 396        |            |            |            |            |            |            |            |            |            |            |            |
| Total length (bp)                                                                               | 727,049    |            |            |            |            |            |            |            |            |            |            |            |
| Average length (bp)                                                                             | 957.9      |            |            |            |            |            |            |            |            |            |            |            |
| GCI% (Weighted)                                                                                 | 31.3       |            |            |            |            |            |            |            |            |            |            |            |
| GCI% (Average)                                                                                  | 28.4       |            |            |            |            |            |            |            |            |            |            |            |
| GCI% (Ave 200/2000)                                                                             | 29.8       |            |            |            |            |            |            |            |            |            |            |            |

\* No. introns used after removing too short (< 100bp) and too long (> 2000bp) introns.  
GCI% (Weighted): Cumulative GC% calculated from all introns concatenated  
GCI% (Average): Average GC% calculated from all introns  
GCI% (Ave 200/2000): Average GC% calculated from introns between 200bp and 2000bp
